# Supplementary material
Source: HighWire-hosted journal article supplement (https://diabetes.diabetesjournals.org/content/suppl/2008/01/31/db07-1692)

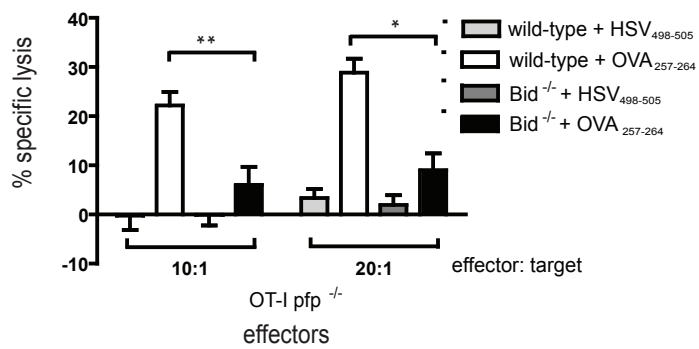

Appendix Figure 1.

Supplement: db071692onlineappendixfigure.pdf [file db071692onlineappendixfigure.pdf]

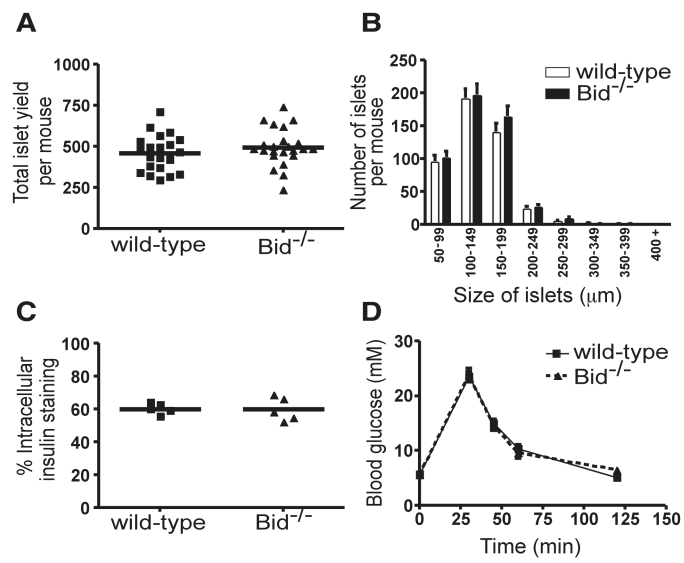

Figure 1.

Supplement: Figure1.pdf [file Figure1.pdf]

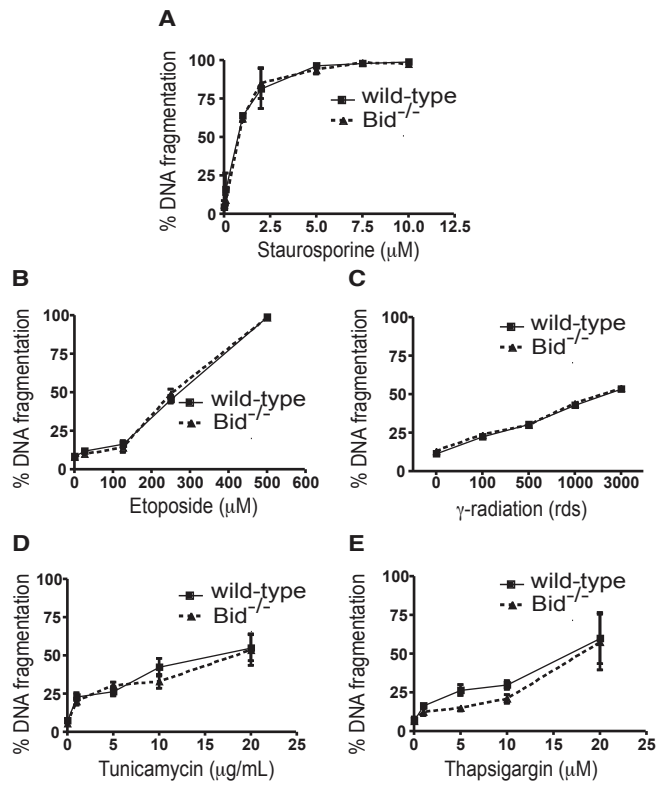

Figure 2.

Supplement: Figure2.pdf [file Figure2.pdf]

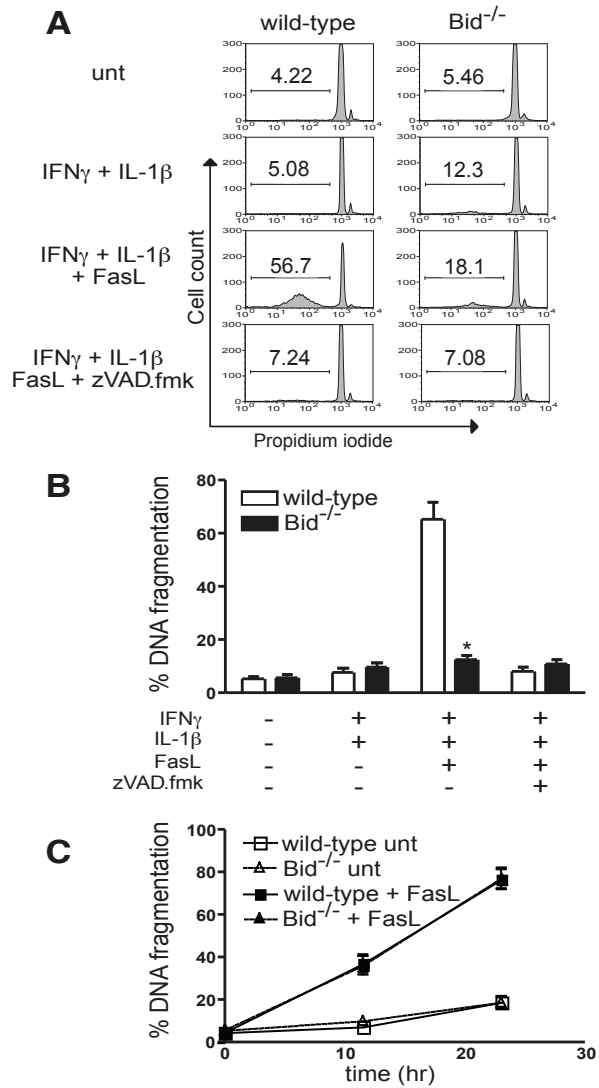

Figure 3.

Supplement: Figure3.pdf [file Figure3.pdf]

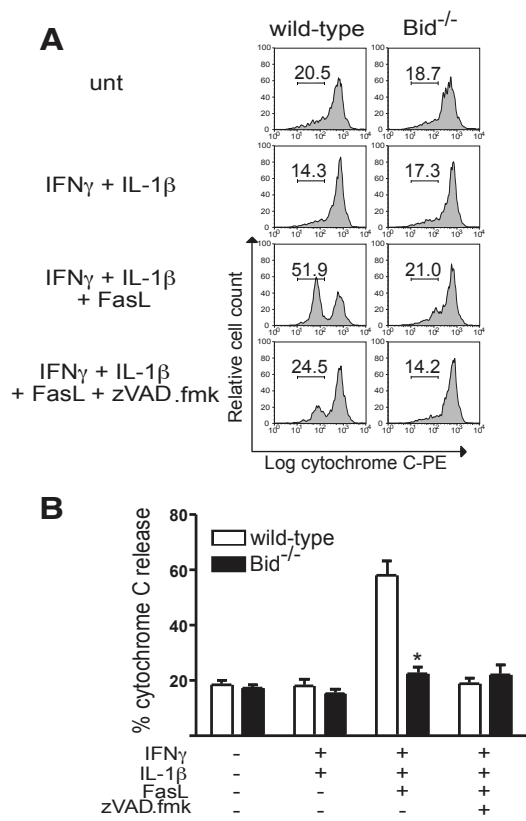

Figure 4.

Supplement: Figure4.pdf [file Figure4.pdf]

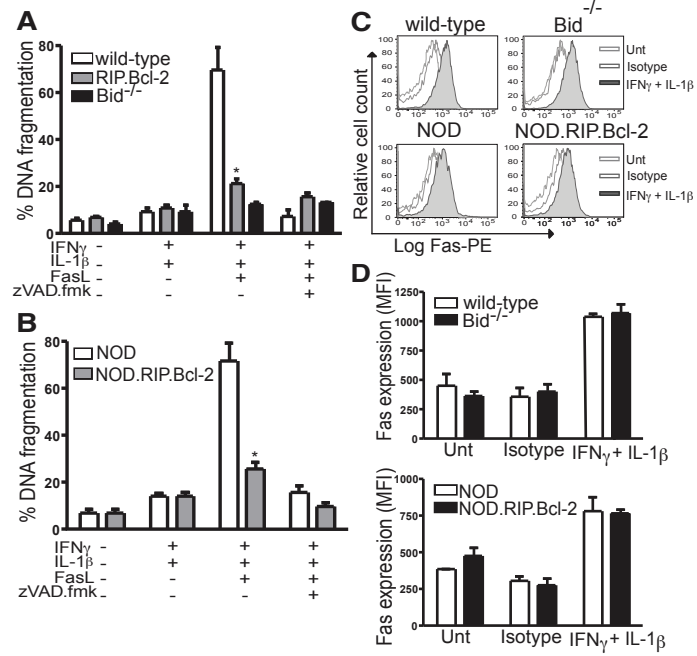

Figure 5.

Supplement: Figure5.pdf [file Figure5.pdf]

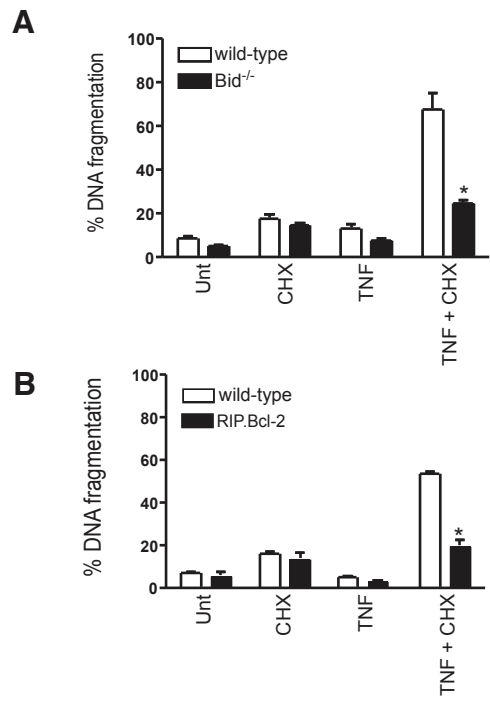

Figure 6.

Supplement: Figure6.pdf [file Figure6.pdf]

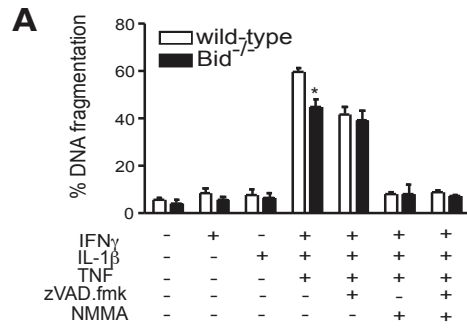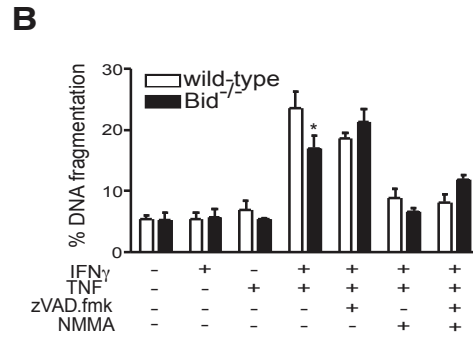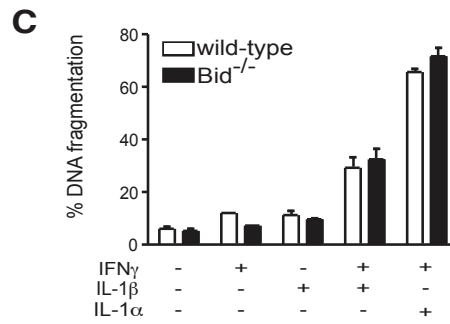

Figure 7.

Supplement: Figure7.pdf [file Figure7.pdf]

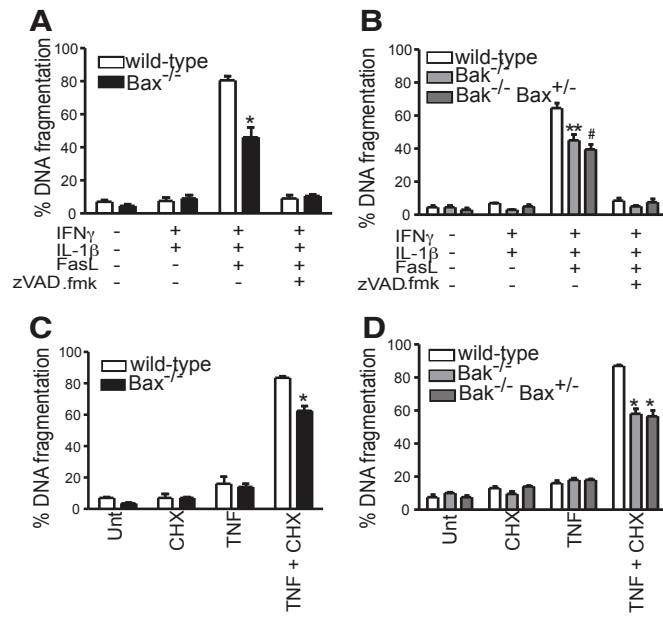

Figure 8.

Supplement: Figure8.pdf [file Figure8.pdf]
